# Supplementary material for: Comparison of Bioactive Compounds and Antioxidant Activities in Differentially Pigmented Cerasus humilis Fruits
Source: MDPI journal article supplement (doi:10.3390/molecules28176272), 2023-08-27
Supplement: s1 [file s1]

Supplementary Materials

**Table S1.** The *C. humilis* flavonoid and carotenoid metabolism-related structural genes and their homologous genes.

| <i>C. humilis</i> gene ID | Homologous gene ID  | <i>C. humilis</i> gene name | Identity (%) | bit score |
|---------------------------|---------------------|-----------------------------|--------------|-----------|
| ouLi_016331-RA            | AT2G37040.1         | <i>ChPAL</i>                | 80.94        | 1229      |
| ouLi_008981-RA            | AT2G30490.1         | <i>ChC4H</i>                | 72.73        | 421       |
| ouLi_000029-RB            | AT5G13930.1         | <i>ChCHS</i>                | 75.44        | 95.1      |
| ouLi_002001-RA            | AT2G43570.1         | <i>ChCHI</i>                | 53.20        | 204       |
| ouLi_004921-RA            | AT5G08640.1         | <i>ChFLS</i>                | 60.80        | 431       |
| ouLi_020095-RA            | AT3G51240.1         | <i>ChF3H</i>                | 82.51        | 602       |
| ouLi_003659-RA            | AT5G42800.1         | <i>ChDFR</i>                | 74.01        | 530       |
| ouLi_025349-RA            | AT4G22880.1         | <i>ChANS</i>                | 63.76        | 426       |
| ouLi_010520-RA            | AT5G54060.1         | <i>ChUFGT</i>               | 57.77        | 250       |
| ouLi_015020-RB            | AT5G17230.3         | <i>ChPSY</i>                | 70.59        | 605       |
| ouLi_001612-RA            | AT4G14210.1         | <i>ChPDS</i>                | 81.69        | 965       |
| ouLi_006033-RA            | AT3G04870.1         | <i>ChZDS</i>                | 76.21        | 795       |
| ouLi_019396-RA            | AT1G06820.1         | <i>ChCRTISO</i>             | 85.25        | 958       |
| ouLi_020488-RA            | orange1.lg011835m.g | <i>ChLCYE</i>               | 93.33        | 94.4      |
| ouLi_013072-RA            | AT2G32640.1         | <i>ChLCYB</i>               | 72.09        | 865       |
| ouLi_015444-RA            | AT5G52570.1         | <i>ChCHYB</i>               | 67.41        | 414       |
| ouLi_019786-RA            | AT5G67030.1         | <i>ChZEP</i>                | 70.99        | 948       |
| ouLi_005872-RA            | AT1G08550.1         | <i>ChVDE</i>                | 49.57        | 387       |
| ouLi_025636-RB            | orange1.lg025796m.g | <i>ChNSY</i>                | 70.37        | 270       |
